# Supplementary material
Source: PubMed Central journal article supplement (PMC514476)
Supplement: pnas_101_33_12318__1.pdf [file pnas_101_33_12318__1.pdf]

AACAGAAAAT CAATAATACT ATAGGATAGA <sup>a</sup>GAGGTATGTG ATTGT ATG CCT AAA TCA  
M P K S

<sup>c</sup>  
GAA ATA AGA AAA TTA CTT CAA GAA ATC AAA AAA CAA GTA GAT AAT CCG  
E I R K L L Q E I K K Q V D N P  
GGG AAT TCA TCT ACA ACT GAA ATT AAA AAA ATG GCT TCA GAA GCT GGC  
G N S S T T E I K K M A S E A G  
ATT GAC GAA CAA ACT GCC GAA GAA ATC TAC CAT TTA CTC ACT GAA TTT  
I D E Q T A E E I Y H L L T E F  
TAT CAA GCC GTT GAA GAA CAC GGT GGA ATC GAA AAA TAT ATG CAT TCC  
Y Q A V E E H G G I E K Y M H S

<sup>c</sup>  
AAT ATT AGT TGG TTA AAA ATC GAA TTA GAA CTA CTT TCC GCA TGT TAC  
N I S W L K I E L E L L S A C Y

<sup>a</sup>  
CAA ATT GCT ATT TTA GAA GAT ATG AAG GTC CTT GAT ATC TCT GAA ATG  
Q I A I L E D M K V L D I S E M

<sup>c</sup> <sup>c</sup>  
CTC AGC CTA AAT GAT TTG CGG ATT TTT CCA AAG ACT CCA AGC CAA CTA  
L S L N D L R I F P K T P S Q L

CAA AAC ACT TAC TAC AAA CTA AAA AAA GAG CTT ATC CAA GTA GAA GAT  
Q N T Y Y K L K K E L I Q V E D

ATT CCG AAA AAC AAG CCT GGG AGA AAA AGA AAA ACA CAA AAA AAT ACA  
I P K N K P G R K R K T Q K N T

AAA AAA GAA AAA ACC AAT ATT TTC GGC AAA GTT GTG CCA GCT GAA TTC  
K K E K T N I F G K V V P A E F

AAA GCA CCA GCG TCC ATC AAA GAA CAA ATC AGC TAC GAC AAA TCA CGC  
K A P A S I K E Q I S Y D K S R

GAA AAA AAC CTG GTT GAT TTA CTT TCC GGC GTT AAA AGC AAT GTT CAA  
E K N L V D L L S G V K S N V Q

<sup>a</sup>  
CTT TTG AGC GAA AAC CAA GGT GAA GAA AAC AAC GTA TAT GAC TTA CTA  
L L S E N Q G E E N N V Y D L L

AAA AGC ATT TAC TCC TTG TCG TCC CTT GCT GTT CAA AAA GAA GAA CTC  
K S I Y S L S S L A V Q K E E L

GAC AAA AAA TAC CAA GAC TTA CAA ACA AAA TGC CAA GAA TTG GAA CAG  
D K K Y Q D L Q T K C Q E L E Q

GAA AAT TCC TAT TTA AAA CAA CAA AAC GAA ACC ATG ACA GAT TCG TTC  
E N S Y L K Q Q N E T M T D S F

CAT ACA CTT GTG TTA CAA GTA GCT GAT TTC GCT TAT GCC AGT GAT TTA  
H T L V L Q V A D F A Y A S D L

<sup>t</sup>  
GAC CAA ATC CAA GCA CTG CCA CTT TTT AGC CAG CAG CTC GTT GTA ACA  
D Q I Q A L P L F S Q Q L V V T

CTG AAC CAA CTT GGT GTA TTC AAA GAA AAT TAT AAA CAA ATG TAA  
L N Q L G V F K E N Y K Q M \*
