# Supplementary material
Source: PubMed Central journal article supplement (PMC514476)
Supplement: pnas_101_33_12318__2.pdf [file pnas_101_33_12318__2.pdf]

**Table 1. *Listeria* and *Escherichia coli* strains**

| Strain name                         | Genotype and relevant features                                          | Strain No. | Ref.           |
|-------------------------------------|-------------------------------------------------------------------------|------------|----------------|
|                                     | <b><i>Listeria</i> strains</b>                                          |            |                |
| <i>L. innocua</i>                   | Wild-type <i>L. innocua</i> strain                                      | DH-L657    | N. Freitag     |
| EGDe                                | Wild-type <i>L. monocytogenes</i> strain                                | DH-L478    | M. Loessner    |
| EGDe pPL2                           | pPL2 integrated in EGDe                                                 | DH-L997    | This study     |
| EGDe pPL3e-301- <i>lacZ</i>         | 301-bp <i>flaA</i> promoter- <i>lacZ</i> construct integrated in EGDe   | DH-L991    | This study     |
| EGDe pPL3e-234- <i>lacZ</i>         | 234-bp <i>flaA</i> promoter- <i>lacZ</i> construct integrated in EGDe   | DH-L989    | This study     |
| EGDe pPL3e-172- <i>lacZ</i>         | 172-bp <i>flaA</i> promoter- <i>lacZ</i> construct integrated in EGDe   | DH-L988    | This study     |
| EGDe pPL3e-116- <i>lacZ</i>         | 116-bp <i>flaA</i> promoter- <i>lacZ</i> construct integrated in EGDe   | DH-L987    | This study     |
| EGDe pPL3e-89- <i>lacZ</i>          | 89-bp <i>flaA</i> promoter- <i>lacZ</i> construct integrated in EGDe    | DH-L986    | This study     |
| EGDe pPL3e-25- <i>lacZ</i>          | 25-bp <i>flaA</i> promoter- <i>lacZ</i> construct integrated in EGDe    | DH-L985    | This study     |
| EGDe pHPL3- <i>lacZ</i>             | Hyper-SPO1- <i>lacZ</i> construct integrated in EGDe                    | DH-L1074   | This study     |
| EGDe <i>flaA</i> ::Tn               | Tn917 insertion in <i>flaA</i> in EGDe                                  | DH-L975    | This study     |
| EGDe <i>flaA</i> ::Tn pPL3          | pPL3 integrated in EGDe <i>flaA</i> ::Tn                                | DH-L1173   | This study     |
| EGDeΔ <i>flaA</i>                   | <i>flaA</i> in-frame deletion in EGDe                                   | DH-L1042   | This study     |
| EGDeΔ674                            | <i>lmo0674</i> in-frame deletion in EGDe                                | DH-L1156   | This study     |
| EGDeΔ674 pPL3                       | pPL3 integrated in EGDeΔ674                                             | DH-L1197   | This study     |
| EGDeΔ674 pPL3-674E                  | pPL3-674E integrated in EGDeΔ674                                        | DH-L1198   | This study     |
| EGDeΔ674 pPL3-674S                  | pPL3-674S integrated in EGDeΔ674                                        | DH-L1199   | This study     |
| EGDeΔ674 <i>flaA</i> ::Tn           | Tn917 insertion in <i>flaA</i> in strain EGDeΔ674                       | DH-L1179   | This study     |
| EGDeΔ674 <i>flaA</i> ::Tn pPL3      | pPL3 integrated in EGDeΔ674 <i>flaA</i> ::Tn                            | DH-L1211   | This study     |
| EGDeΔ674 <i>flaA</i> ::Tn pPL3-674E | pPL3-674E integrated in EGDeΔ674 <i>flaA</i> ::Tn                       | DH-L1212   | This study     |
| EGDeΔ674 <i>flaA</i> ::Tn pPL3-674S | pPL3-674S integrated in EGDeΔ674 <i>flaA</i> ::Tn                       | DH-L1213   | This study     |
| 10403S                              | Wild-type <i>L. monocytogenes</i> strain                                | DH-L481    | 1 <sup>1</sup> |
| 10403S pPL3e-301- <i>lacZ</i>       | 301-bp <i>flaA</i> promoter- <i>lacZ</i> construct integrated in 10403S | DH-L1135   | This study     |
| 10403S pPL3e-234- <i>lacZ</i>       | 234-bp <i>flaA</i> promoter- <i>lacZ</i> construct integrated in 10403S | DH-L1134   | This study     |
| 10403S pPL3e-172- <i>lacZ</i>       | 172-bp <i>flaA</i> promoter- <i>lacZ</i> construct integrated in 10403S | DH-L1133   | This study     |
| 10403S pPL3e-116- <i>lacZ</i>       | 116-bp <i>flaA</i> promoter- <i>lacZ</i> construct integrated in 10403S | DH-L1132   | This study     |
| 10403S pPL3e-89- <i>lacZ</i>        | 89-bp <i>flaA</i> promoter- <i>lacZ</i> construct integrated in 10403S  | DH-L1131   | This study     |
| 10403S pPL3e-25- <i>lacZ</i>        | 25-bp <i>flaA</i> promoter- <i>lacZ</i> construct integrated in 10403S  | DH-L1136   | This study     |
| 10403S pHPL3- <i>lacZ</i>           | Hyper-SPO1- <i>lacZ</i> construct integrated in 10403S                  | DH-L1096   | This study     |
|                                     | <b><i>Escherichia coli</i> strains</b>                                  |            |                |

<sup>1</sup> ?/Au: Add refs. 1, 2, 3, 4 under the body of the table. I was unsure as to which refs. were being cited (from the main text?).

| Strain name                     | Genotype and relevant features                                                                                   | Strain No. | Ref.       |
|---------------------------------|------------------------------------------------------------------------------------------------------------------|------------|------------|
| XL1-Blue                        | (F' <i>proAB lacI<sup>q</sup> Δ(lacZ)M15 Tn10</i> ) <i>recA1, endA1, gyrA96, thi-1, hsdR17, supE, relA1, lac</i> | DH-E182    | Stratagene |
| SM10 pPL2                       | pPL2 is a <i>Listeria</i> site-specific integration vector                                                       | DH-E585    | 2          |
| XL1-Blue pPL3                   | pPL2-derivative containing multiple transcription terminators                                                    | DH-E898    | A. Shen    |
| XL1-Blue pHPL3                  | pPL3-derivative containing Hyper-SPO1 promoter                                                                   | DH-E899    | A. Shen    |
| XL1-Blue pPL3e                  | pPL3-derivative with Gram+ <i>ermC</i> gene in place of Gram+ <i>cat</i> gene                                    | DH-E964    | E. Troy    |
| XL1-Blue pPL3e-301- <i>lacZ</i> | pPL3e-derivative with 301 bp <i>flaA</i> promoter- <i>lacZ</i> fusion                                            | DH-E984    | This study |
| XL1-Blue pPL3e-234- <i>lacZ</i> | pPL3e-derivative with 234 bp <i>flaA</i> promoter- <i>lacZ</i> fusion                                            | DH-E983    | This study |
| XL1-Blue pPL3e-172- <i>lacZ</i> | pPL3e-derivative with 172 bp <i>flaA</i> promoter- <i>lacZ</i> fusion                                            | DH-E982    | This study |
| XL1-Blue pPL3e-116- <i>lacZ</i> | pPL3e-derivative with 116 bp <i>flaA</i> promoter- <i>lacZ</i> fusion                                            | DH-E981    | This study |
| XL1-Blue pPL3e-89- <i>lacZ</i>  | pPL3e-derivative with 89 bp <i>flaA</i> promoter- <i>lacZ</i> fusion                                             | DH-E979    | This study |
| XL1-Blue pPL3e-25- <i>lacZ</i>  | pPL3e-derivative with 25 bp <i>flaA</i> promoter- <i>lacZ</i> fusion                                             | DH-E978    | This study |
| XL1-Blue pHPL3- <i>lacZ</i>     | pHPL3-derivative with Hyper-SPO1- <i>lacZ</i> fusion                                                             | DH-E1073   | This study |
| JM109 pCON1                     | pCON1 is a <i>Listeria</i> allelic exchange vector                                                               | DH-E123    | 3          |
| XL1-Blue pCON1Δ0674             | pCON1Δ0674 was used to create the <i>lmo0674</i> deletion in strain EGDe                                         | DH-E1154   | This study |
| XL1-Blue pKSV7ΔflaA             | pKSV7ΔflaA was used to create the <i>flaA</i> deletion in strain EGDe                                            | DH-E972    | 4          |

1. Bishop, D. K. & Hinrichs, D. J. (1987) *J. Immunol.* **139**, 2005-2009.

2. Lauer, P., Chow, M. Y. N., Loessner, M. J., Portnoy, D. A. & Calendar, R. (2002) *J. Bacteriol.* **184**, 4177-4186.

3. Freitag, N. E. (2000) in *Gram-Positive Pathogens*, eds. Fischetti, V. A., Novick, R. P., Ferretti, J. J., Portnoy, D. A. & Rood, J. I. (Am. Soc. Microbiol., Washington, DC), pp. 488-498.

4. Shetron-Rama, L. M., Mueller, K., Bravo, J. M., Bouwer, H. G., Way, S. S. & Freitag, N. E. (2003) *Mol. Microbiol.* **48**, 1537-1551.
